# Supplementary material for: A 14-Day Double-Blind, Randomized, Controlled Crossover Intervention Study with Anti-Bacterial Benzyl Isothiocyanate from Nasturtium (Tropaeolum majus) on Human Gut Microbiome and Host Defense
Source: MDPI journal article supplement (doi:10.3390/nu16030373), 2024-01-26

Supplementary Figure S1: NMDS plot of thetaYC distances for three dimensions.

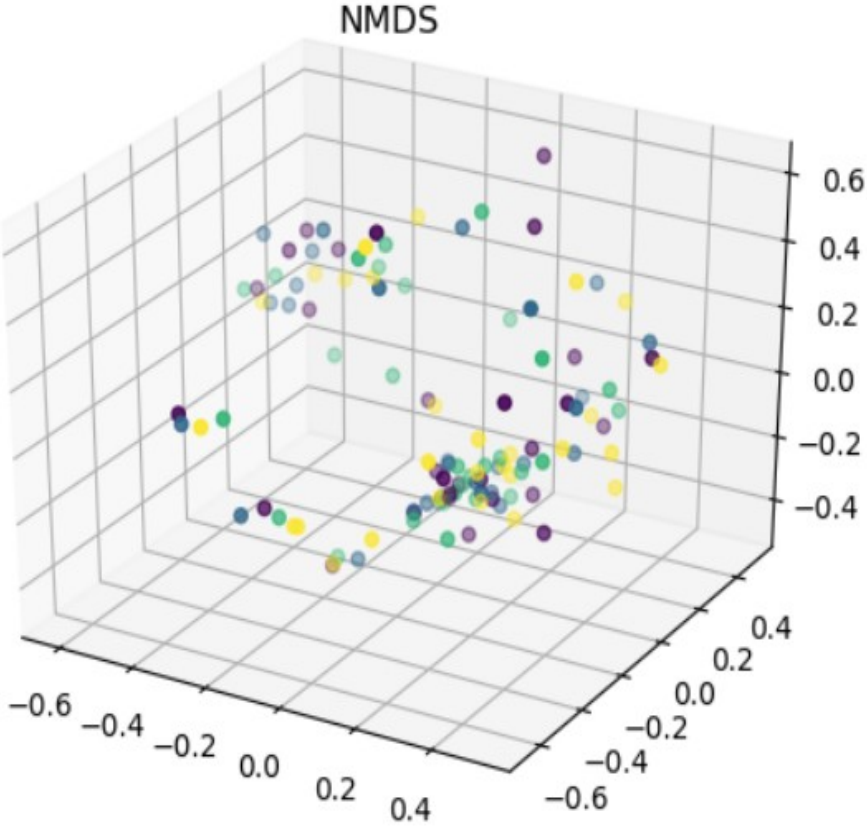

Supplementary Figure S2: Relative abundance of high-level phenotypes ( $n = 29$  subjects) using BugBase web application.

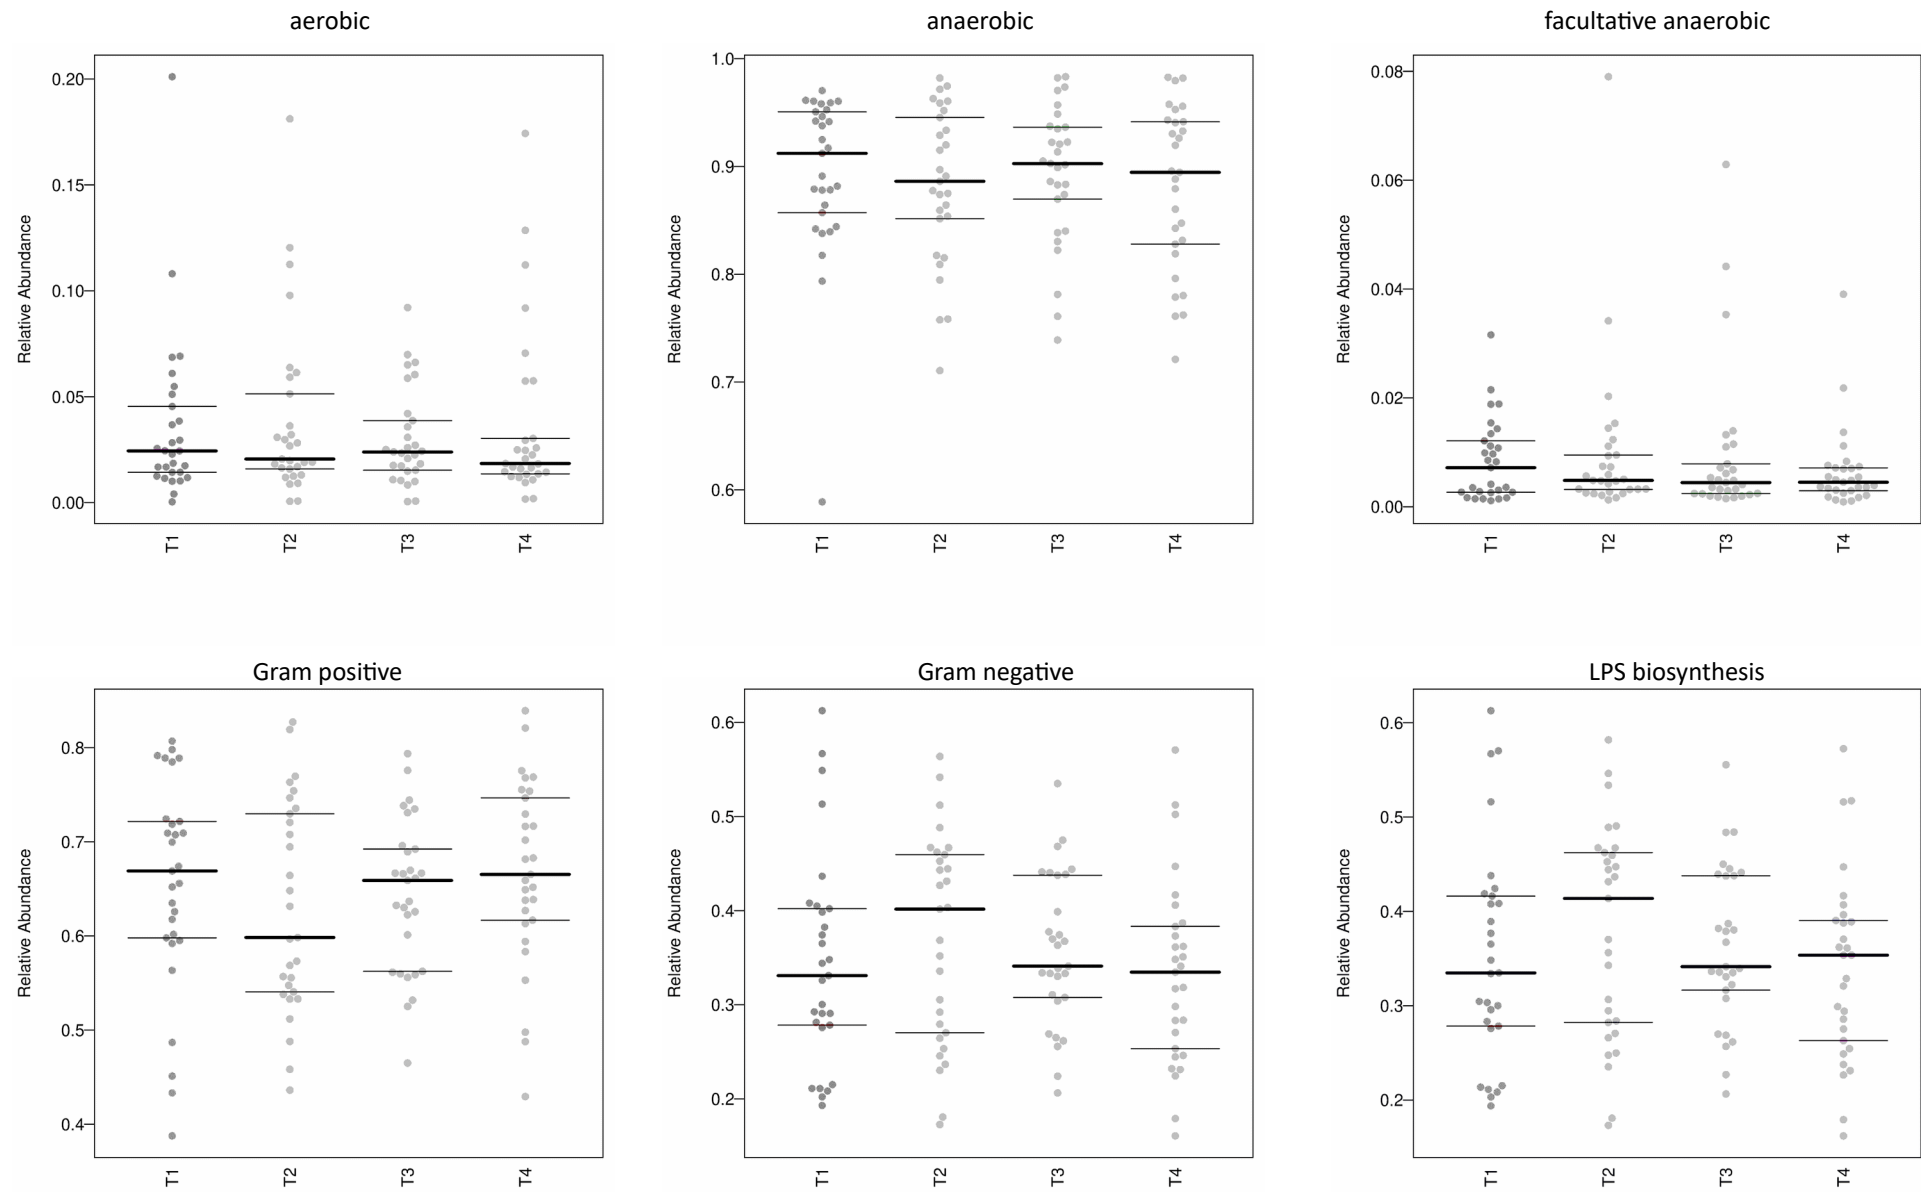

# Supplementary Figure S3: Metabolome analysis using QTRAP.

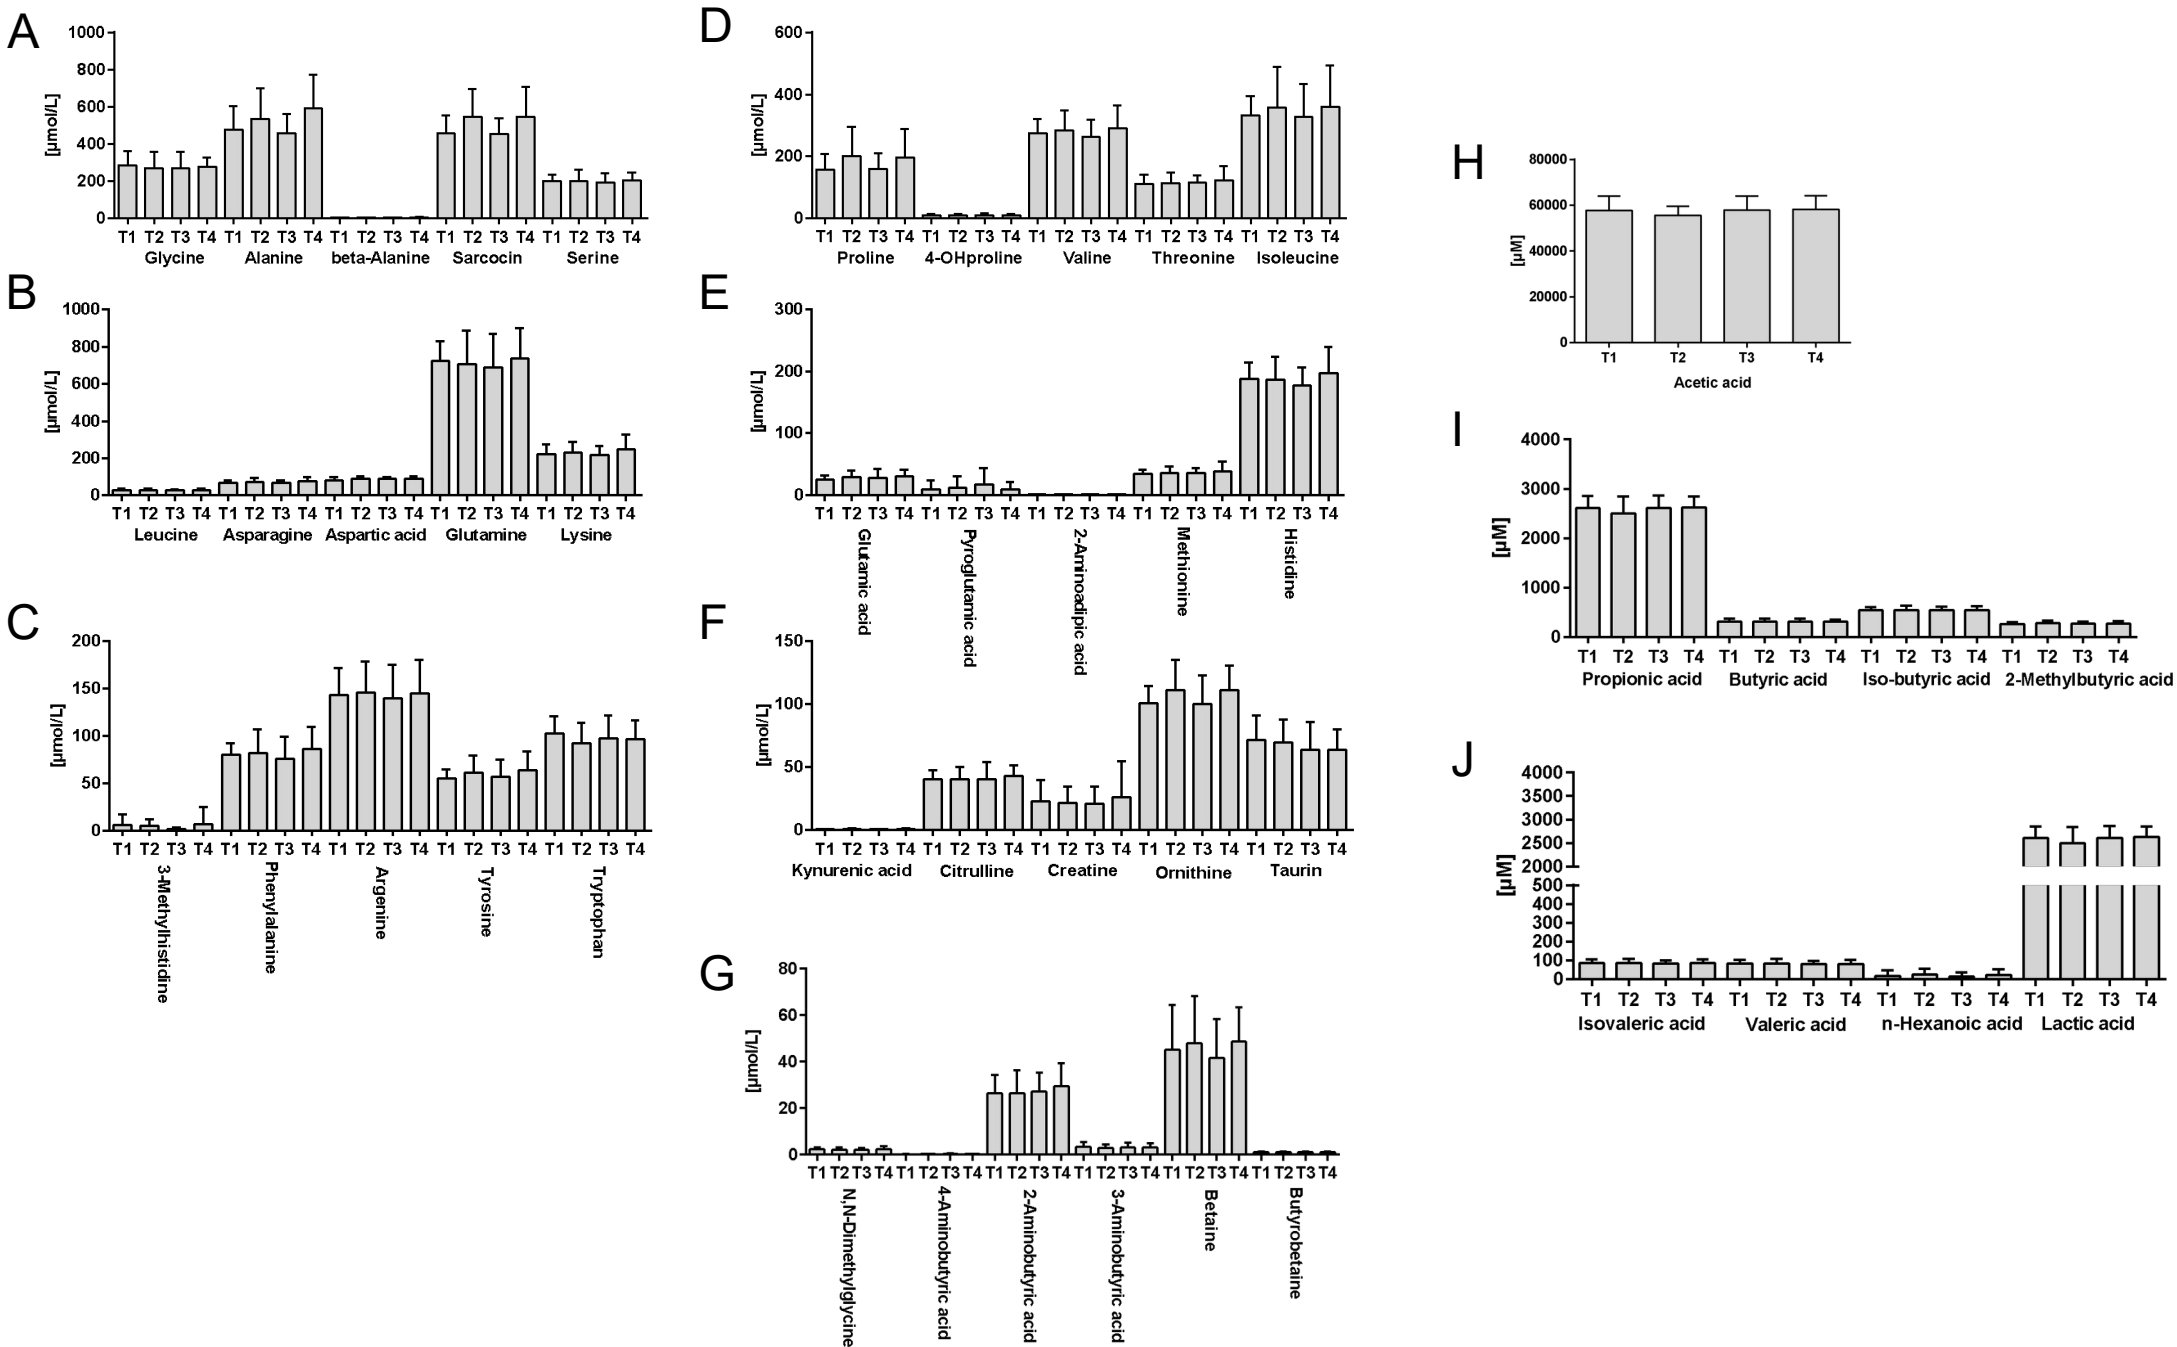

Supplementary Figure S4: Correlation of bacteria abundance between subgroups.

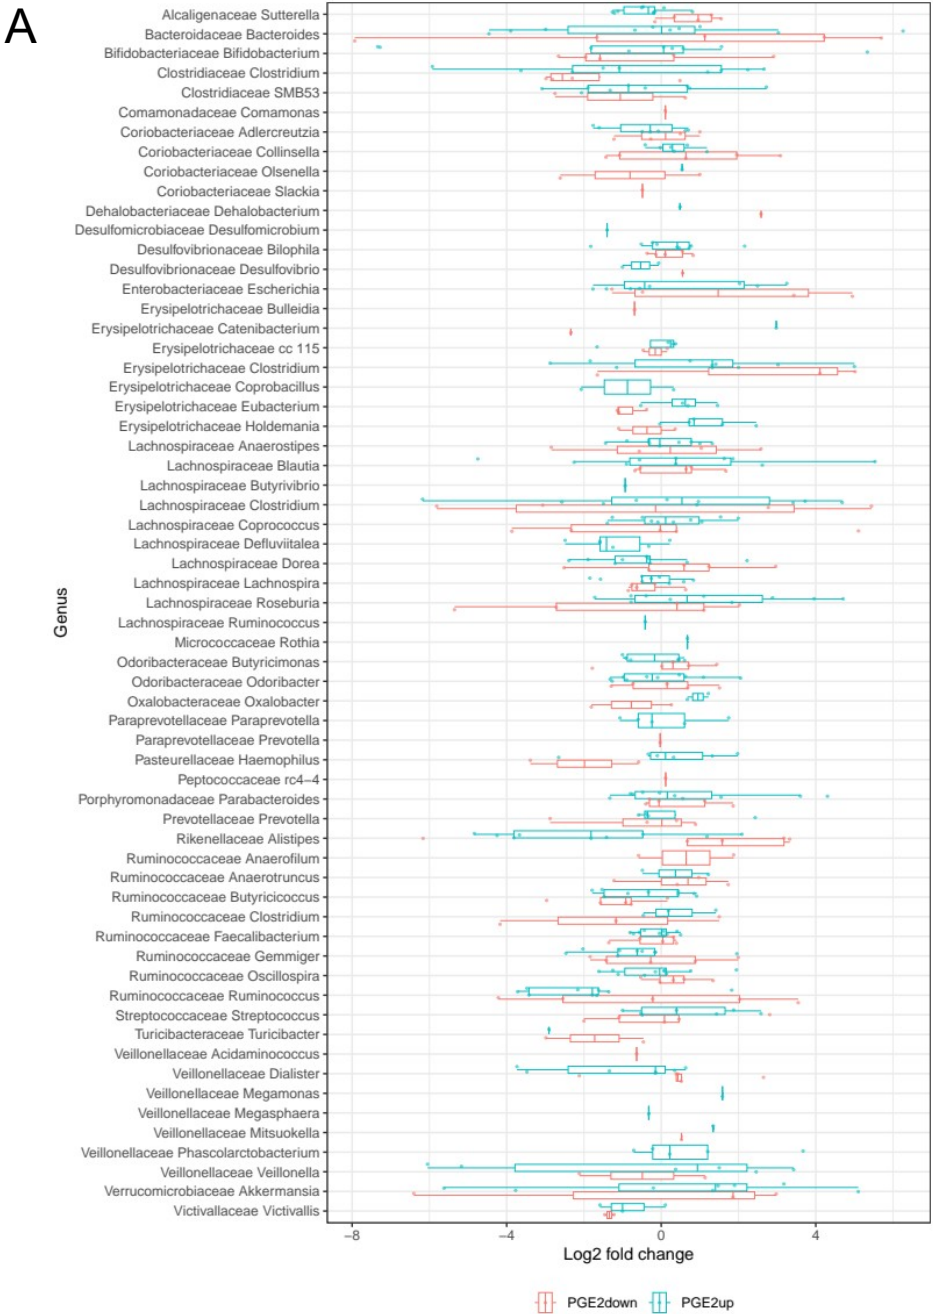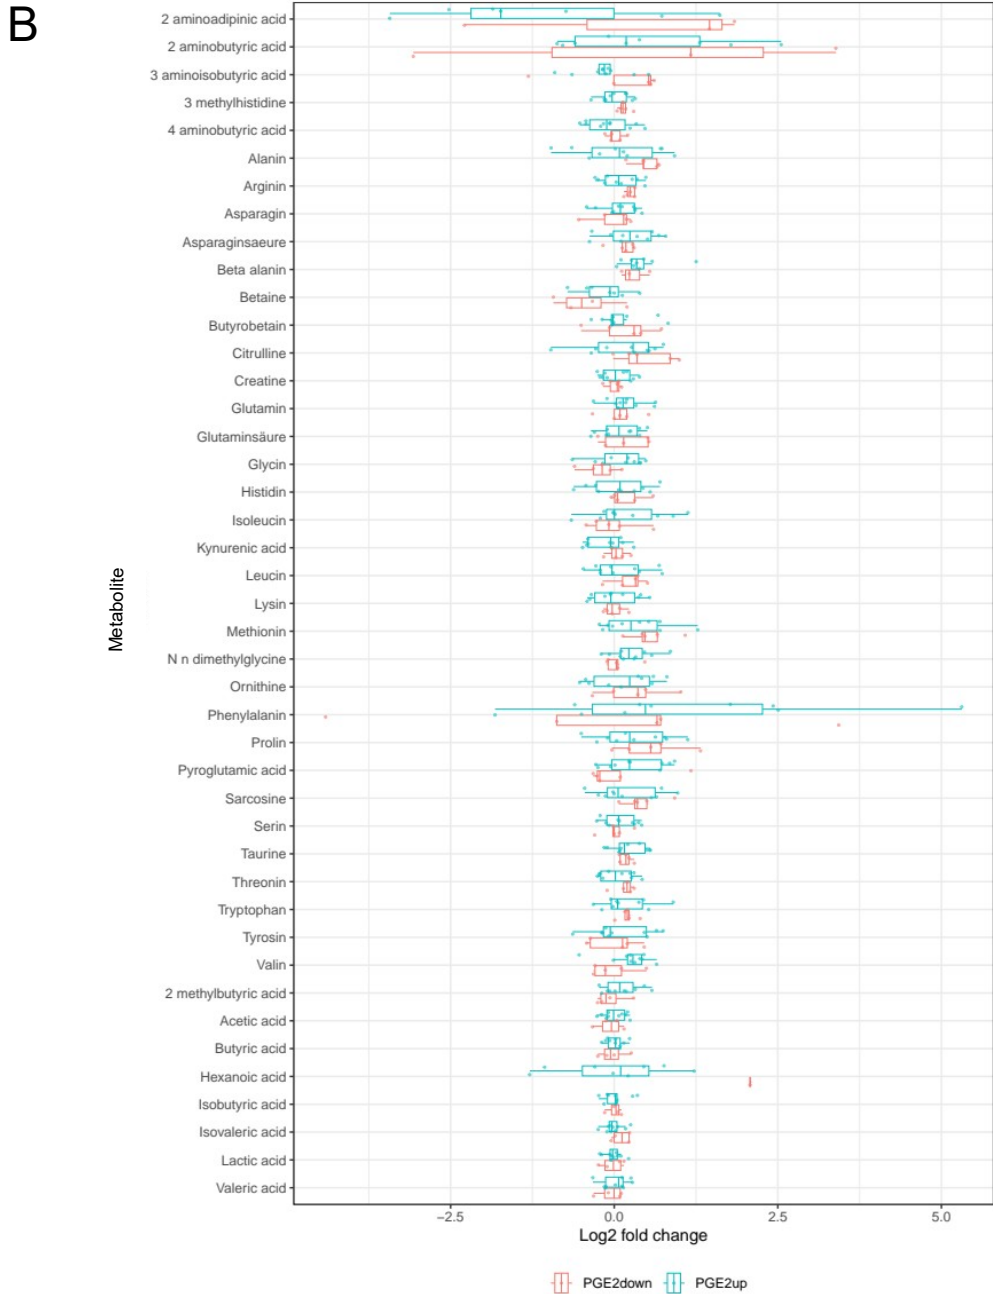

Supplement: s1 [file s1]
